# Supplementary material for: Impact of Sugar Type Addition and Fermentation Temperature on Pomegranate Alcoholic Beverage Production and Characteristics
Source: MDPI journal article supplement (doi:10.3390/antiox10060889), 2021-06-01
Supplement: s1 [file s1]

**Table S1.** Aroma-related compounds (mg L<sup>-1</sup>) of pomegranate-based juices fortified with different sugar containing materials as additional fermentable carbohydrate sources.

| Compounds                             | PJ   | PJ+S | PJ+CPJ | PJ+CGJ | PJ+H |
|---------------------------------------|------|------|--------|--------|------|
| <b>Esters</b>                         |      |      |        |        |      |
| ethyl acetate                         | 0.1  | 0.1  | 0.1    | 0.1    | 0.1  |
| ethyl octanoate                       | Nd   | Nd   | Nd     | Nd     | 0.1  |
| <b>Alcohols</b>                       |      |      |        |        |      |
| 2-methyl-1-propanol                   | <0.1 | <0.1 | <0.1   | <0.1   | <0.1 |
| 3-methyl-1-butanol                    | 0.2  | 0.1  | 0.1    | 0.1    | 0.1  |
| 2-methyl-1-butanol                    | 0.1  | 0.1  | <0.1   | <0.1   | <0.1 |
| 3-methyl-2-buten-1-ol                 | Nd   | <0.1 | Nd     | <0.1   | Nd   |
| (z)-3-hexen-1-ol                      | 0.5  | <0.1 | 0.5    | 0.2    | 0.5  |
| 1-hexanol                             | 0.5  | 0.4  | 0.5    | 0.3    | 0.5  |
| 2-phenylethanol (phenylethyl alcohol) | <0.1 | <0.1 | <0.1   | <0.1   | <0.1 |
| a-terpineol                           | 0.1  | <0.1 | <0.1   | <0.1   | 0.1  |
| 2,4-bis(1,1-dimethylethyl)-phenol     | <0.1 | <0.1 | <0.1   | <0.1   | <0.1 |

Nd, Not detected; PJ, pomegranate juice; PJ+S, pomegranate juice with added sucrose (20° Brix, final content); PJ+CPJ, pomegranate juice with added concentrated pomegranate juice (20° Brix, final content); PJ+CGJ, pomegranate juice with added concentrated grape juice (20° Brix, final content); PJ+H, pomegranate juice with added honey (20° Brix, final content).

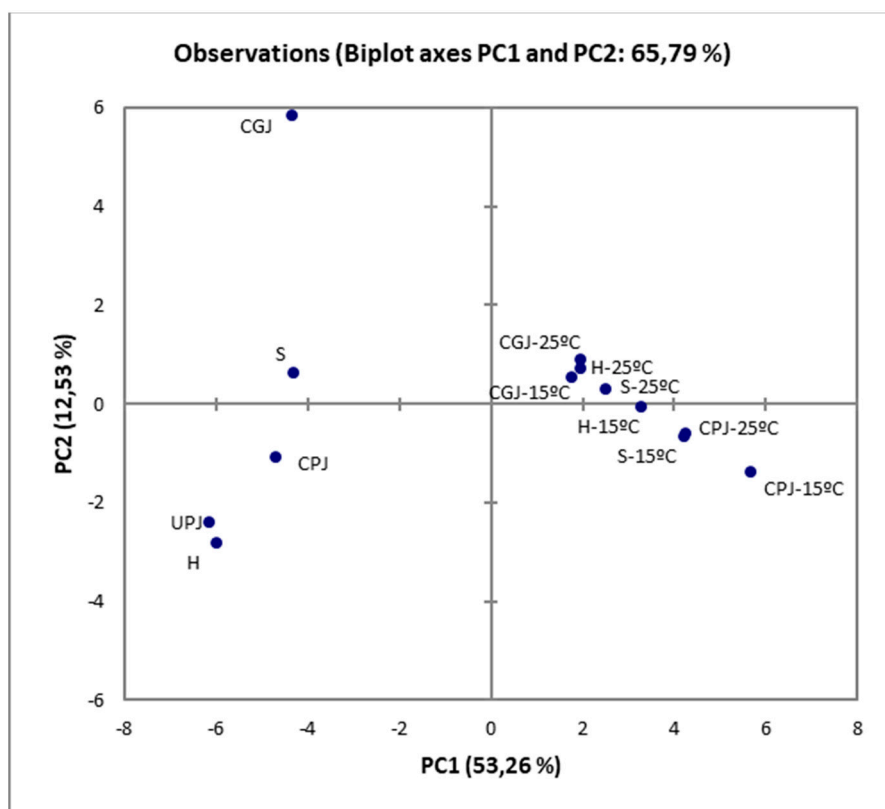

**Figure S1.** Principal component analysis (PCA) plot of minor volatiles detected in juices and PABs fortified with the addition of different types of sugars to enhance fermentability of the raw material, at 15 °C and 25 °C. PABs, pomegranate alcoholic beverages; S, pomegranate juice with added sucrose; S-15°C and S-25°C, PABs with added sucrose fermented at 15 and 25°C, respectively; CPJ, pomegranate juice with added concentrated pomegranate juice; CPJ-15°C and CPJ-25°C, PABs with added concentrated pomegranate juice fermented at 15 and 25°C, respectively; CGJ, pomegranate juice with added concentrated grape juice; CGJ-15°C and CGJ-25°C, PABs with added concentrated grape juice fermented at 15 and 25°C, respectively; H, pomegranate juice with added honey; H-15°C and H-25°C, PABs with added honey fermented at 15 and 25°C, respectively.
